# Supplementary material for: Isomaltulose alleviates acute colitis via modulating gut microbiota and the Treg/Th17 balance in mice
Source: Royal Society of Chemistry journal article supplement (doi:10.1039/d2fo01157c), 2022-01-01
Supplement: d2fo01157c1.pdf [file d2fo01157c1.pdf]

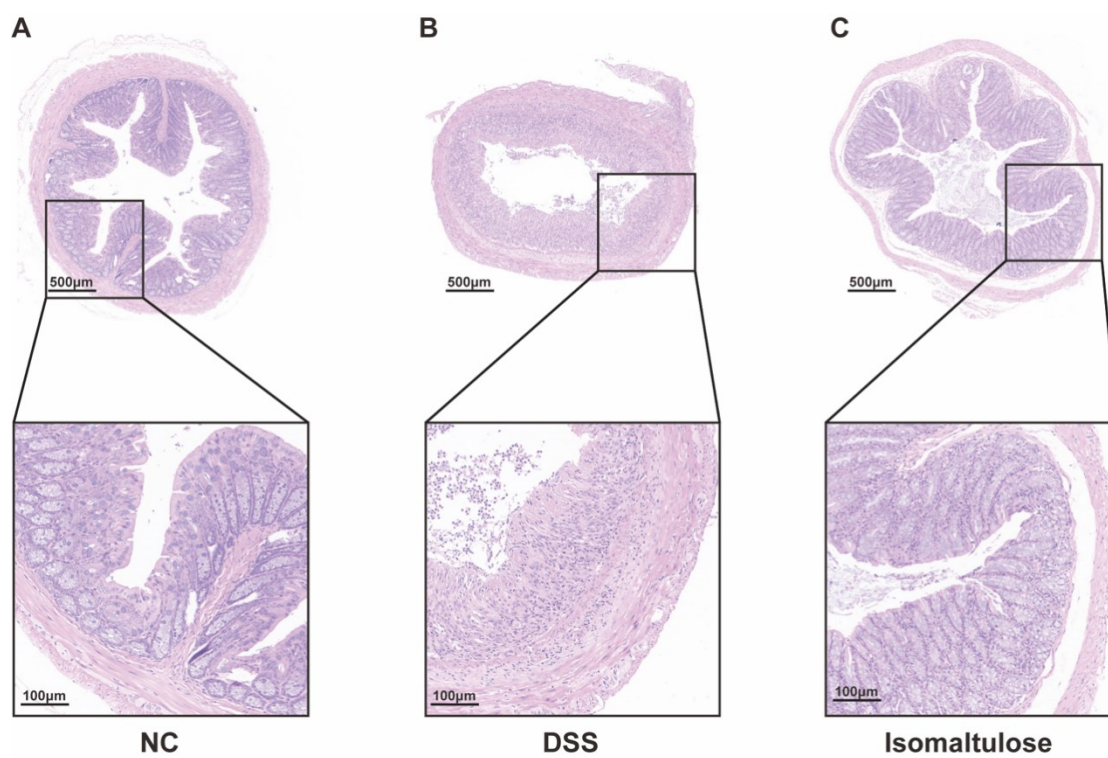

**Figure S1.** Isomaltulose improved the pathological changes of DSS-induced UC.

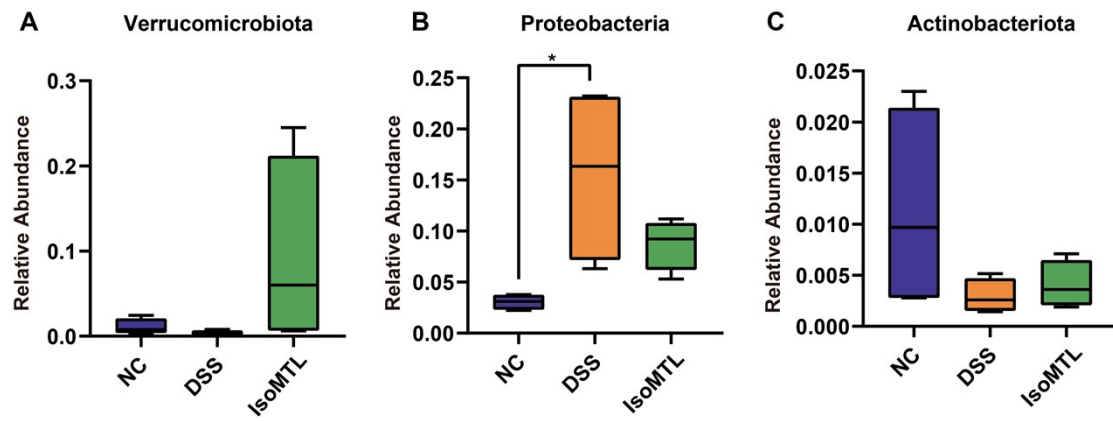

**Figure S2. Isomaltulose modulates the relative abundance of gut microbiota.** (A-C) Relative abundance of *Verrucomicrobiota*, *Proteobacteria* and *Actinobacteriota* in the three groups. Compared to the indicated group, \*P < 0.05.

**Table S1. The primers sequences used for RT-PCR reaction.**

| <b>Target gene</b> | <b>Primer sequence</b>      |
|--------------------|-----------------------------|
| GAPDH              | F: GGTTGTCTCCTGCGACTTCA     |
|                    | R: TGGTCCAGGGTTTCTTACTCC    |
| IL-10              | F: TCCCTGGGTGAGAAGCTGAAGAC  |
|                    | R: CACCTGCTCCACTGCCTTGC     |
| IL-17              | F: TGATGCTGTTGCTGCTGCTGAG   |
|                    | R: CACATTCTGGAGGAAGTCCTTGGC |
| ZO-1               | F: CTGGTGAAGTCTCGGAAAAATG   |
|                    | R: CATCTCTTGCTGCCAAACTATC   |
| Occludin           | F: TGCTTCATCGCTTCCTTAGTAA   |
|                    | R: GGGTTCACTCCCATTATGTACA   |
| Claudin-1          | F: AGATACAGTGCAAAGTCTTCGA   |
|                    | R: CAGGATGCCAATTACCATCAAG   |

F: Forward; R: Reverse
